# Supplementary material for: End-Cloud Collaboration Approach for State-of-Charge Estimation in Lithium Batteries Using CNN-LSTM and UKF
Source: MDPI journal article supplement (doi:10.3390/batteries9020114), 2023-02-06
Supplement: s1 [file s1]

# Supplementary Materials

## End-cloud collaboration approach for state-of-charge estimation in lithium batteries using CNN-LSTM and UKF

Wentao Wang<sup>1</sup>, Bin Ma<sup>1,\*</sup>, Xiao Hua<sup>3</sup>, Bosong Zou<sup>4</sup>, Lisheng Zhang<sup>1</sup>, Hanqing Yu<sup>1</sup>,

Kaiyi Yang<sup>1</sup>, Shichun Yang<sup>1</sup>, Xinhua Liu<sup>1,2</sup>

1 School of Transportation Science and Engineering, Beihang University, Beijing 102206, China

2 Dyson School of Design Engineering, Imperial College London, Exhibition Road, South Kensington Campus, London SW7 2AZ, UK

3 State Key Laboratory of Automotive Safety and Energy, Tsinghua University, Beijing 100084, People's Republic of China

4 China Software Testing Center, Beijing 100038, China

\* Correspondence: mabin\_wayne@sina.cn

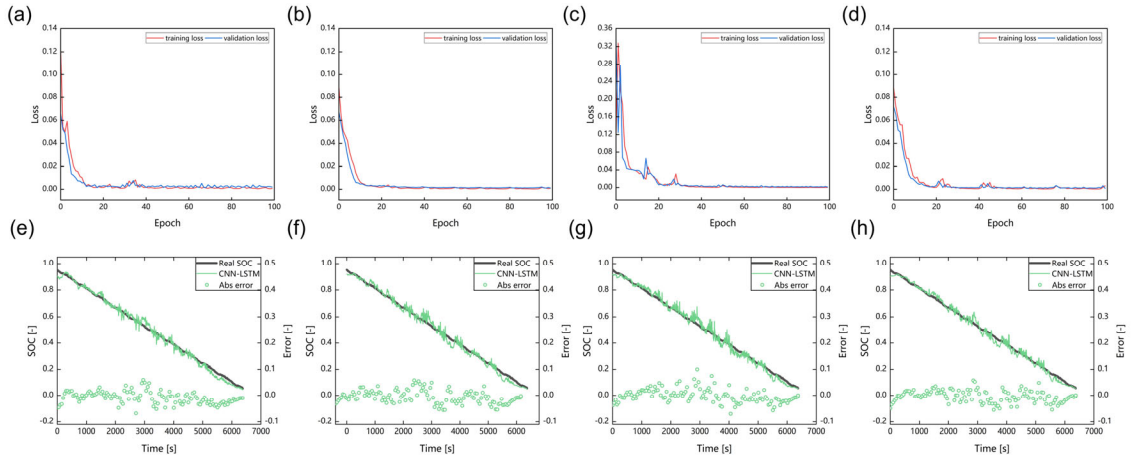

**Figure S1.** The training and testing process of the CNN-LSTM: (a), (b), (c) and (d) are the training loss and

validation loss for the network structure Conv-Pooling-LSTM, Conv-Conv-Pooling-LSTM,

Conv-Pooling-LSTM-LSTM and Conv-Conv-Pooling-LSTM-LSTM respectively. (e), (f), (g) and (h) are the SOC

estimation results for the different structures, respectively.

**Table S1.** The SOC estimation results with different network structures for US06 profiles at 25°C.

| Model structure             | RMSE(%) |
|-----------------------------|---------|
| Conv-Pooling-LSTM           | 2.38    |
| Conv-Conv-Pooling-LSTM      | 2.58    |
| Conv-Pooling-LSTM-LSTM      | 2.56    |
| Conv-Conv-Pooling-LSTM-LSTM | 2.39    |

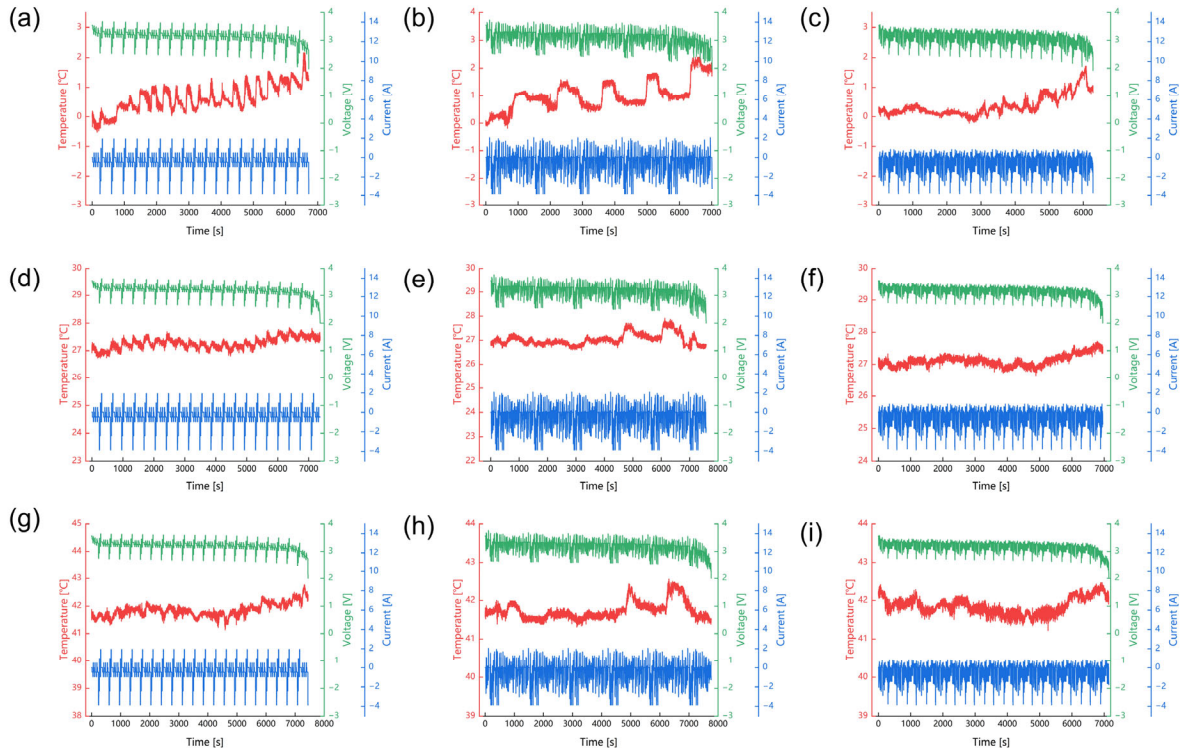

**Figure S2.** Current profiles and measured voltage and temperature under different driving cycles and different

temperatures. (a), (b) and (c) donate DST, FUDS and US06 at 0°C, and (d), (e) and (f) are for 25°C, (g), (h) and (i)

are for 40°C, respectively.

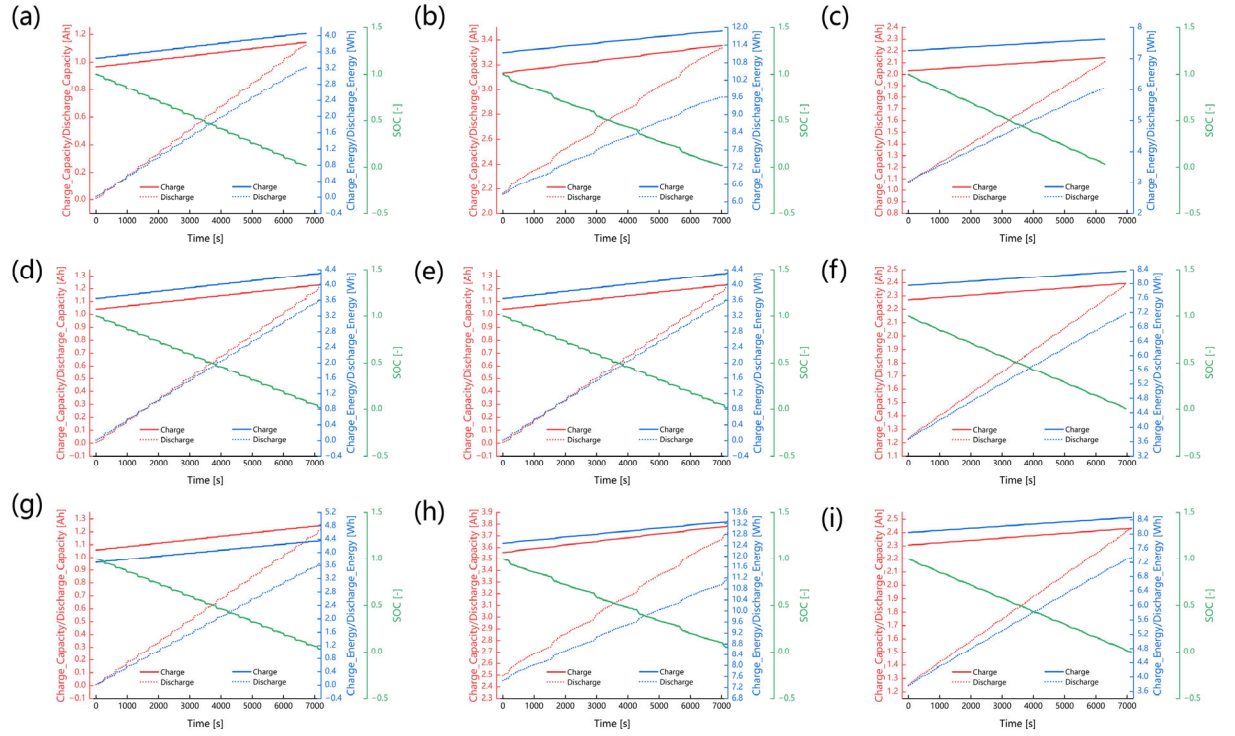

**Figure S3.** Other variable values including charge capacity, discharge capacity, charge energy and discharge

energy for the dataset under different driving cycles and different temperatures. (a), (b) and (c) donate DST, FUDS

and US06 at 0°C, and (d), (e) and (f) are for 25°C, (g), (h) and (i) are for 40°C, respectively.

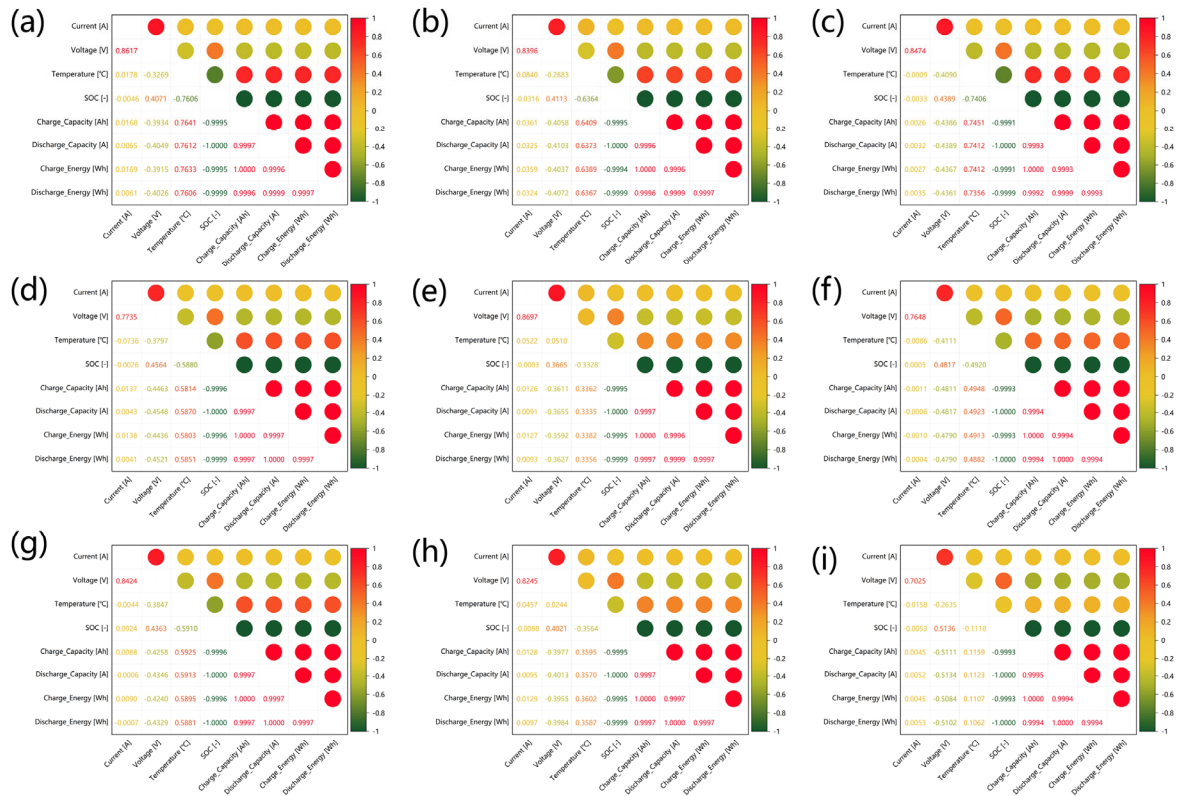

**Figure S4.** Correlation analysis for the variable values with SOC.
